# Supplementary material for: The p97 Inhibitor UPCDC-30245 Blocks Endo-Lysosomal Degradation
Source: Pharmaceuticals (Basel). 2022 Feb 7;15(2):204. doi: 10.3390/ph15020204 (PMC8880557; doi:10.3390/ph15020204)
Supplement: Supplementary file 1 [file pharmaceuticals-15-00204-s001.zip › pharmaceuticals-1562477-supplementary.pdf]

## Supplementary information

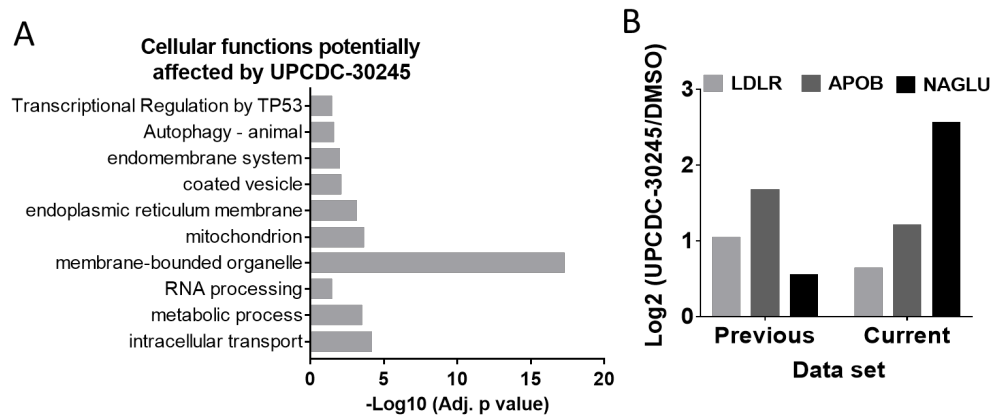

Figure S1. **(A)** Functional enrichment analysis on proteins affected by UPCDC-30245. HCT116 cells were treated with 4  $\mu$ M UPCDC-30245 for 6 hours then label free proteomic was performed on the prepared samples,  $n = 2$ . DE analysis was performed using Proteome Discoverer 2.4 [1] and re-analyzed using gprofiler (<https://biit.cs.ut.ee/gprofiler/gost>). **(B)** The log2 fold change of LDLR, APOB and NAGLU from previous [1] and new data set.

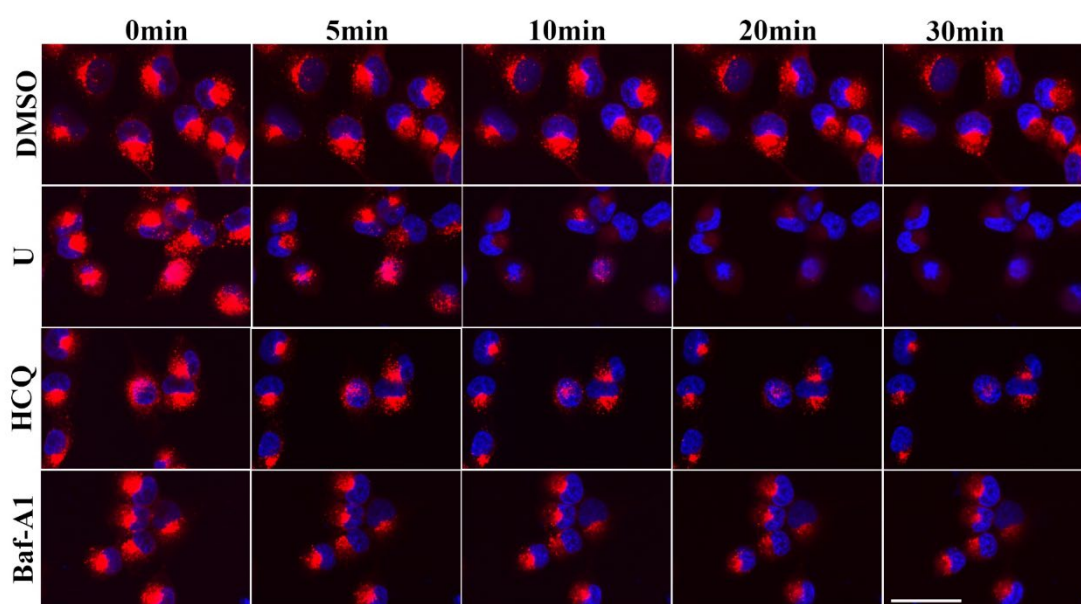

Figure S2. UPCDC-30245 rapidly reduced the LysoTracker staining in H1299 cells. Cells were pre-treated with LysoTracker for 30 min. After removing LysoTracker, DMSO, 5  $\mu$ M of UPCDC-30245 (U), 50  $\mu$ M of HCQ or 10  $\mu$ M of Baf\_A1 were added to the cells. Images were taken at 0, 5, 10, 20 and 30 min after the addition of compounds. Scale bar indicates 50  $\mu$ m.

Table S1 qPCR probes used in this study

| Target    | Catalog Number |
|-----------|----------------|
| GAPDH     | Hs02786624_g1  |
| HCoV-229E | Vi06439671_s1  |
| p62       | Hs00177654_m1  |
| p97       | Hs00997640_g1  |
| ATF3      | Hs00231069_m1  |
| CHOP      | Hs01090850_m1  |

## Reference

1. Wang, F., et al., *Temporal proteomics reveal specific cell cycle oncoprotein downregulation by p97/VCP inhibition*. Cell Chem Biol, 2021.
